# Supplementary material for: Rational synthesis of Ni nanoparticle-embedded porous graphitic carbon nanosheets with enhanced lithium storage properties
Source: Royal Society of Chemistry journal article supplement (doi:10.1039/c5nr05568g), 2015-01-01
Supplement: c5nr05568g1.pdf [file c5nr05568g1.pdf]

## Supporting Information

Rational synthesis of Ni nanoparticle-embedded porous graphitic carbon nanosheets with enhanced lithium storage properties

Jingfei Zhang,<sup>a</sup> Huimin Zhu,<sup>a</sup> Ping Wu,<sup>a</sup> Cunwang Ge,<sup>b</sup> Dongmei Sun,<sup>\*a</sup> Lin Xu,<sup>\*a</sup> Yawen Tang,<sup>a</sup> and Yiming Zhou<sup>a</sup>

Jiangsu Key Laboratory of New Power Batteries, Jiangsu Collaborative Innovation Center of Biomedical Functional Materials, School of Chemistry and Materials Science, Nanjing Normal University, Nanjing 210023, PR China

Corresponding authors: Dongmei Sun, [dongmeisun@njnu.edu.cn](mailto:dongmeisun@njnu.edu.cn); Lin Xu, [njuxulin@gmail.com](mailto:njuxulin@gmail.com)

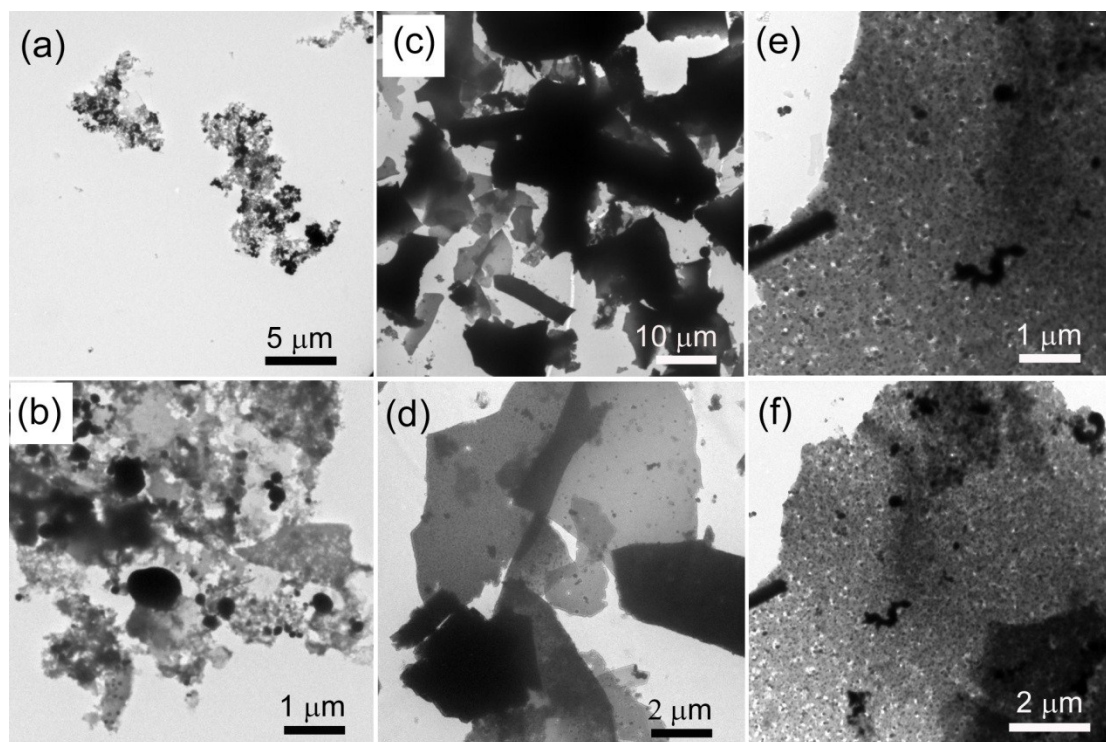

**Figure S1.** TEM images of the products obtained in the presence of different amounts of  $\text{Ni}(\text{NO}_3)_2 \cdot 6\text{H}_2\text{O}$ . (a)-(b) 0.10 g, (c)-(d) 0.20 g, and (e)-(f) 0.40 g.

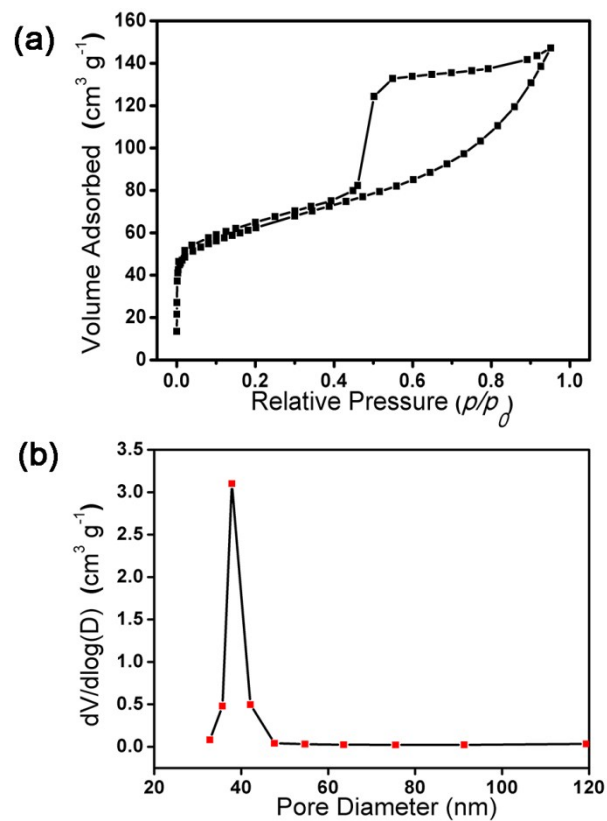

**Figure S2.**  $N_2$  adsorption-desorption isotherms (a) and pore-size distribution curve (b) of the obtained Ni@PGC nanosheets.

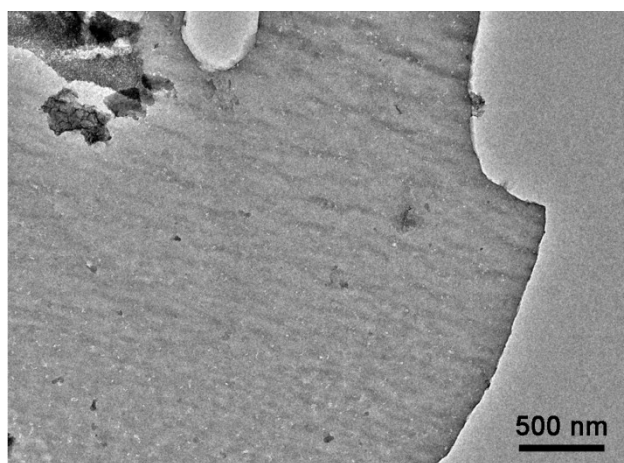

**Figure S3.** TEM image of the obtained pure 2D porous graphitic carbon (PGC) nanosheet.

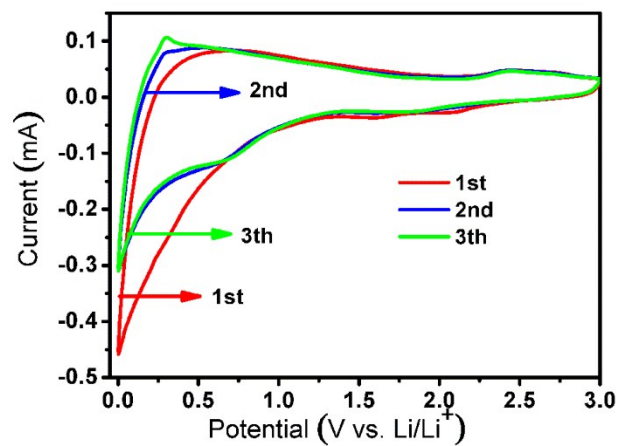

**Figure S4.** Representative CVs of the pure 2D porous graphitic carbon (PGC) nanosheets at a scan rate of  $0.1 \text{ mVs}^{-1}$ .

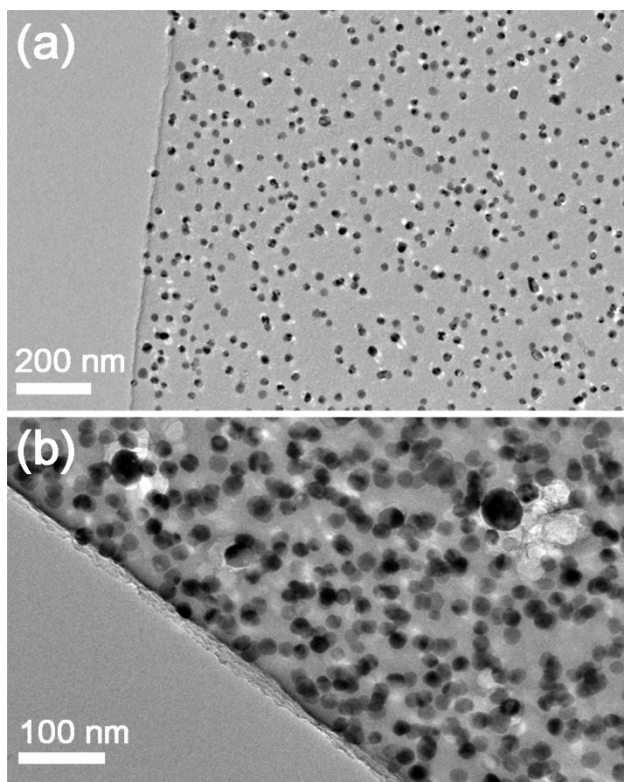

**Figure S5.** TEM images of the as-synthesized 2D Ni@PGC nanosheets before (a) and after (b) cycling tests.
